# Supplementary material
Source: Springer Nature journal article supplement (https://www.springermedizin.de/resource/supplementary/12889_2010_2850_MOESM2_ESM.pdf/9490000)

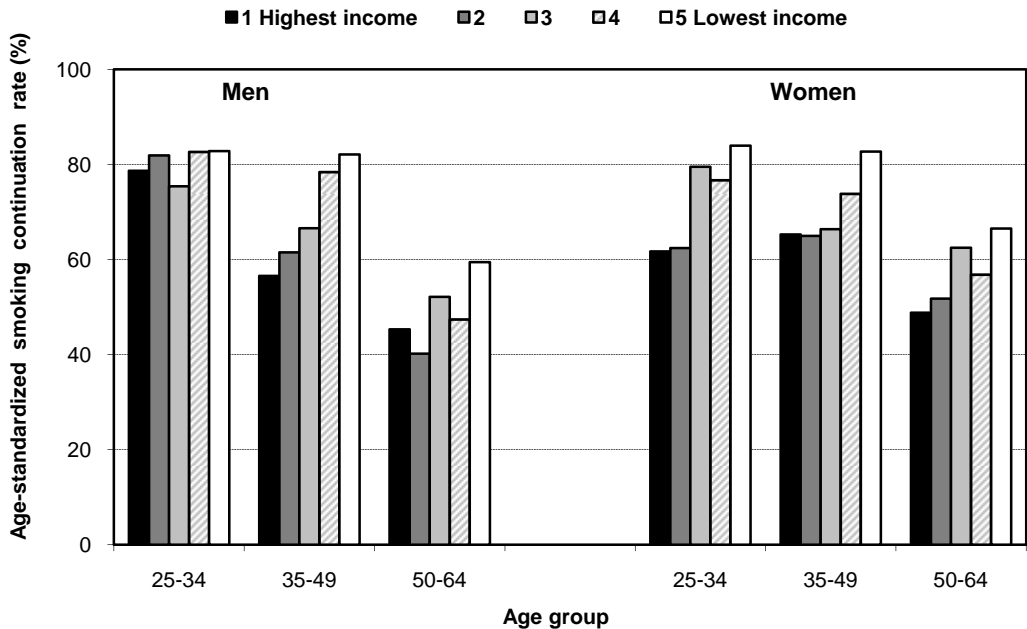

Supplement: MOESM2 [file 9490000]
